# Supplementary material for: Hierarchical micro/nano-structured cobalt sulfide spindles as low-cost counter electrodes for dye-sensitized solar cells
Source: Royal Society of Chemistry journal article supplement (doi:10.1039/c3cp52075g), 2013-01-01
Supplement: c3cp52075g.pdf [file c3cp52075g.pdf]

## Electronic Supplementary Information

### Hierarchical micro/nano-structured cobalt sulfide spindles as low-cost counter electrode for dye-sensitized solar cells

Guiqiang Wang and Shuping Zhuo

#### **Preparation of cobalt sulfide spindles**

All the chemicals with analytic grade were purchased from Aladdin Chemical Ltd. (China) and used without further purification. In a typical synthesis, 50 ml of 0.1M thiourea ( $\text{CH}_4\text{N}_2\text{S}$ ) solution in deionized water was added slowly to 50 ml of 0.06 M  $\text{Co}(\text{CH}_3\text{COO})_2 \cdot 4\text{H}_2\text{O}$  solution in deionized water. Then, 9 ml ammonium hydroxide and 5 ml 1-butanol were added to the above solution with vigorous stirring. The resulting mixture was transferred into a Teflon-lined autoclave, that was then sealed and kept at 195 °C for 24 h followed by cooling down to room temperature. The prepared products were washed with deionized water and ethanol repeatedly and dried in a vacuum oven at 60 °C for 12 h.

#### **Preparation of cobalt sulfide spindles electrode**

100 mg of as-prepared cobalt sulfide spindles sample was dispersed in 10 ml of isopropanol and n-butanol solution with the volume ratio of 7:3. Then 5  $\mu\text{l}$  of tetrabutyl titanate was added into above dispersion and sonicated for 30 min. The obtained dispersion was sprayed onto FTO glass using an airbrush. Subsequently, as-prepared electrodes were sintered at 300 °C for 10 min.

#### **Fabrication of dye-sensitized solar cells**

$\text{TiO}_2$  electrodes with the thickness of 10  $\mu\text{m}$  were prepared by depositing  $\text{TiO}_2$

colloidal paste onto FTO glass and then sintered at 450 °C for 30 min. After cooling to 80 °C, TiO<sub>2</sub> electrodes were immersed into the ethanol solution of N3 dye (0.5 mM) for 12 h at room temperature. A dye-sensitized solar cell was fabricated by clamping a dye-sensitized TiO<sub>2</sub> electrode, a drop of electrolyte and a counter electrode with two clips. The electrolyte was prepared by dissolving 0.4 M 1-methyl-3-propylimidazolium iodide, 0.3 M LiI, 0.05M I<sub>2</sub> and 0.4 M 4-tert-butylpyridine in 3-methoxypropionitrile.

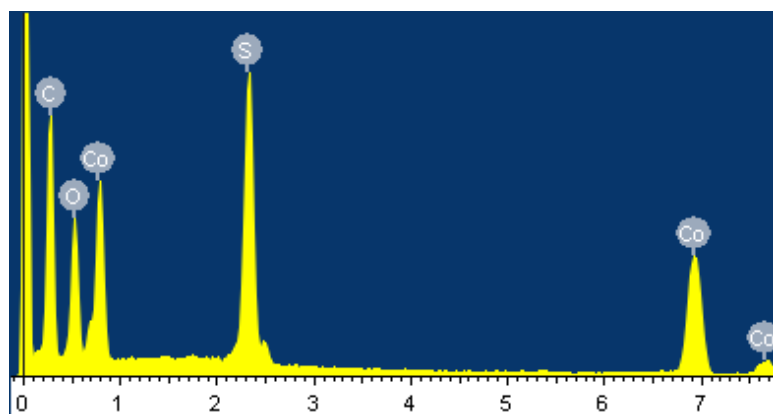

Fig. S1 EDX analysis of as-prepared cobalt sulfide

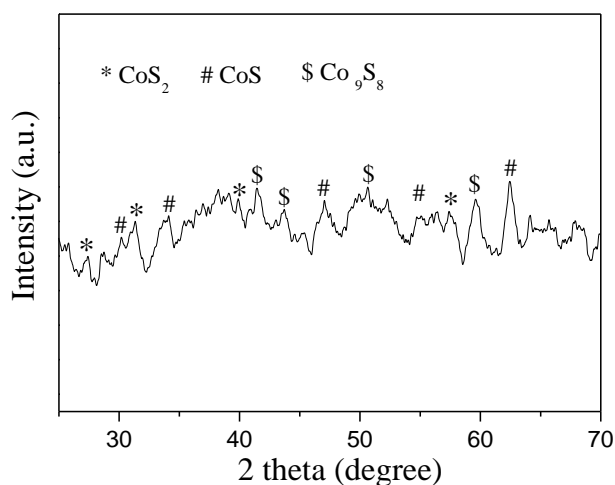

Fig. S2 X-ray diffraction pattern of as-prepared cobalt sulfide spindles

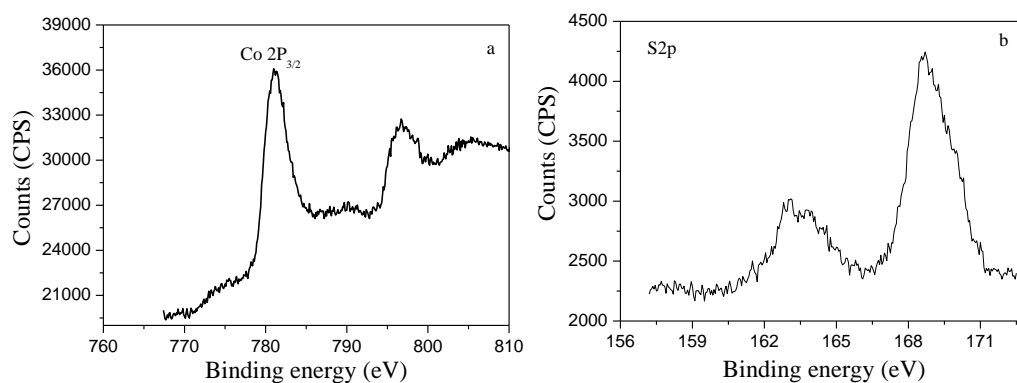

Fig. S3 Co2p (a) and S2p (b) XPS spectrum of as-prepared cobalt sulfide

Table S1 Surface area and pore structure parameters of as-prepared hierarchical micro/nano-structured cobalt sulfide

| $S_{\text{BET}}^{\text{a}}$ ( $\text{m}^2 \text{g}^{-1}$ ) | $V_{\text{T}}^{\text{b}}$ ( $\text{cm}^3 \text{g}^{-1}$ ) | $d_{\text{average}}^{\text{c}}$ (nm) |
|------------------------------------------------------------|-----------------------------------------------------------|--------------------------------------|
| 144.7                                                      | 0.29                                                      | 8.02                                 |

<sup>a</sup> BET(Brunauer-Emmett-Teller) surface area

<sup>b</sup> total pore volume, measured at  $P/P^0=0.995$

<sup>c</sup> average pore size, calculated by  $4V_{\text{T}}/S_{\text{BET}}$

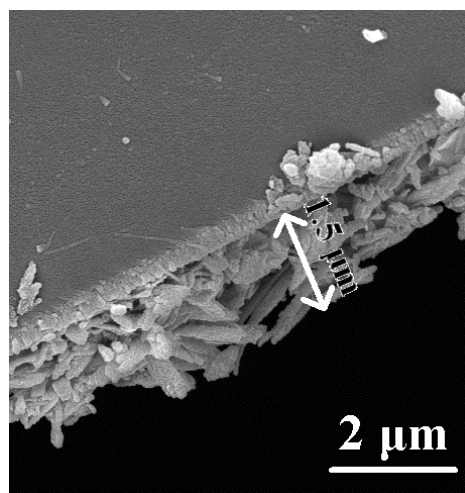

Fig. S4 Cross-section SEM image of cobalt sulfide spindles electrode

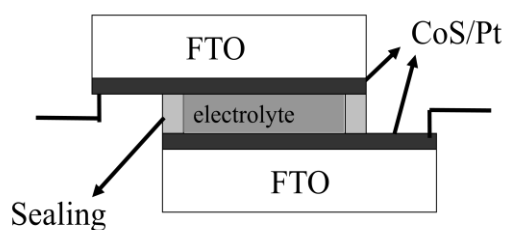

Fig. S5 Electrochemical cell used for EIS measurements

### **Comparison of cobalt sulfide spindles electrodes with other cobalt sulfide electrodes prepared by cathodic electrodeposition.**

The cathodic deposited cobalt sulfide electrodes were prepared by depositing porous cobalt sulfide film onto FTO glass from a deposition bath containing 0.05 mM  $\text{Co}(\text{CH}_3\text{COO})_2 \cdot 4\text{H}_2\text{O}$  and 0.15 M  $\text{CH}_4\text{N}_2\text{S}$  in a three-electrode system. A Pt wire and saturated calomel electrode (SCE) were used as a counter electrode and reference electrode, respectively. The deposition was set between -0.2V and -1.3V vs. SCE at a scan rate of  $10 \text{ mV S}^{-1}$ . Fig. S6 shows the SEM image of cathodically deposited cobalt sulfide film, which displays a porous structure.

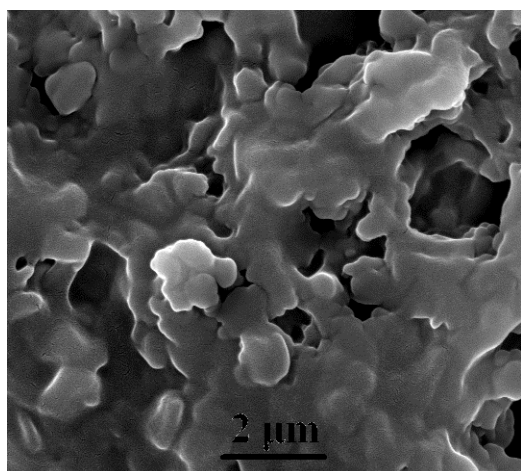

Fig. S6 SEM image of cobalt sulfide electrode prepared by cathodic electrodeposition

Photocurrent density-voltage curve of the dye-sensitized solar cell with porous cobalt sulfide electrode was measured under illumination of  $100 \text{ mW cm}^{-2}$ . The obtained photocurrent density-voltage curve is shown in Fig. S7.

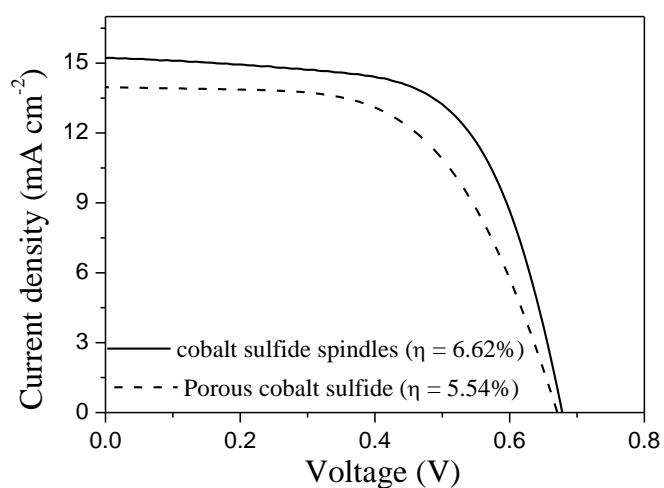

Fig. S7 Photocurrent density-voltage curves of dye-sensitized solar cells with cobalt sulfide spindles electrode and porous cobalt sulfide electrode
